# Supplementary material for: Sox9 Accelerates Vascular Aging by Regulating Extracellular Matrix Composition and Stiffness
Source: PubMed Central journal article supplement (PMC10826924; doi:10.1161/circresaha.123.323365), 2024-01-05
Supplement: res-134-307-s001.pdf [file res-134-307-s001.pdf]

## Major Resources Table

### Antibodies

| Target antigen                 | Vendor or Source         | Catalog # | Working concentration                    | Lot # (preferred but not required) | Persistent ID / URL                                                                                                                                                                                                     |
|--------------------------------|--------------------------|-----------|------------------------------------------|------------------------------------|-------------------------------------------------------------------------------------------------------------------------------------------------------------------------------------------------------------------------|
| Sox9                           | Abcam                    | ab185966  | 1:200 (IHC)<br>1:1000 (WB)<br>1:100 (IF) |                                    | <a href="https://www.abcam.com/products/primary-antibodies/sox9-antibody-epr14335-78-ab185966.html">https://www.abcam.com/products/primary-antibodies/sox9-antibody-epr14335-78-ab185966.html</a>                       |
| P16                            | Abcam                    | ab241543  | 1:500 (IHC)                              |                                    | <a href="https://www.abcam.com/products/primary-antibodies/cdkn2ap16ink4a-antibody-pablo33b-ab241543.html">https://www.abcam.com/products/primary-antibodies/cdkn2ap16ink4a-antibody-pablo33b-ab241543.html</a>         |
| $\alpha$ -SMA                  | Sigma Aldrich            | A5691     | 1:50 (IHC)                               |                                    | <a href="https://www.sigmaaldrich.com/GB/en/product/sigma/a5691">https://www.sigmaaldrich.com/GB/en/product/sigma/a5691</a>                                                                                             |
| CD68                           | Santa Cruz Biotechnology | Sc-70761  | 1:500 (IHC)                              |                                    | <a href="https://www.scbt.com/p/cd68-antibody-3f103">https://www.scbt.com/p/cd68-antibody-3f103</a>                                                                                                                     |
| Plod3                          | Proteintech              | 11027-1AP | 1:100 (IHC)<br>1:1000 (WB)<br>1:250 (IF) |                                    | <a href="https://www.ptglab.com/products/PLOD3-Antibody-11027-1-AP.htm">https://www.ptglab.com/products/PLOD3-Antibody-11027-1-AP.htm</a>                                                                               |
| $\alpha$ -SMA                  | Abcam                    | ab7818    | 1: :5000 (WB)                            |                                    | <a href="https://www.abcam.com/products/primary-antibodies/alpha-smooth-muscle-actin-antibody-1a4-ab7817.html">https://www.abcam.com/products/primary-antibodies/alpha-smooth-muscle-actin-antibody-1a4-ab7817.html</a> |
| GAPDH                          | Sigma Aldrich            | MA1-16757 | 1:5000 (WB)                              |                                    | <a href="https://www.thermofisher.com/antibody/product/GAPDH-Antibody-clone-1D4-Monoclonal/MA1-16757">https://www.thermofisher.com/antibody/product/GAPDH-Antibody-clone-1D4-Monoclonal/MA1-16757</a>                   |
| Beta actin                     | Sigma Aldrich            | A1978     | 1:5000 (WB)                              |                                    | <a href="https://www.sigmaaldrich.com/GB/en/product/sigma/a1978">https://www.sigmaaldrich.com/GB/en/product/sigma/a1978</a>                                                                                             |
| IRDye 800CW Donkey anti-Rabbit | LI-COR Biosciences       | 926-32213 | 1:10000 (WB)                             |                                    | <a href="https://www.licor.com/bio/reagents/irdye-800cw-donkey-anti-rabbit-igg-secondary-antibody">https://www.licor.com/bio/reagents/irdye-800cw-donkey-anti-rabbit-igg-secondary-antibody</a>                         |
| IRDye 680RD Donkey anti-Mouse  | LI-COR Biosciences       | 926-68072 | 1:10000 (WB)                             |                                    | <a href="https://www.licor.com/bio/reagents/irdye-680rd-donkey-anti-mouse-igg-secondary-antibody">https://www.licor.com/bio/reagents/irdye-680rd-donkey-anti-mouse-igg-secondary-antibody</a>                           |
| Fibronectin                    | Abcam                    | ab2413    | 1:500 (IF)                               |                                    | <a href="https://www.abcam.com/products/primary-antibodies/fibronectin-antibody-ab2413.html">https://www.abcam.com/products/primary-antibodies/fibronectin-antibody-ab2413.html</a>                                     |
| CD63                           | Santa Cruz               | s-15,363  | 1:200 (IF)                               |                                    | <a href="https://www.scbt.com/p/cd63-antibody-h-193">https://www.scbt.com/p/cd63-antibody-h-193</a>                                                                                                                     |

|                                       |                |        |            |  |                                                                                                                                                                                                                                                                                                                                                 |
|---------------------------------------|----------------|--------|------------|--|-------------------------------------------------------------------------------------------------------------------------------------------------------------------------------------------------------------------------------------------------------------------------------------------------------------------------------------------------|
| Vinculin                              | Sigma Aldrich  | V9264  | 1:500 (IF) |  | <a href="https://www.sigmaaldrich.com/GB/en/product/sigma/v9264">https://www.sigmaaldrich.com/GB/en/product/sigma/v9264</a>                                                                                                                                                                                                                     |
| gamma-H2AX                            | Cell Signaling | 2577   | 1:200 (IF) |  | <a href="https://www.cellsignal.com/products/primary-antibodies/phospho-histone-h2a-x-ser139-antibody/2577?requestid=2679268">https://www.cellsignal.com/products/primary-antibodies/phospho-histone-h2a-x-ser139-antibody/2577?requestid=2679268</a>                                                                                           |
| Alexa Fluor 546 donkey anti-mouse IgG | Invitrogen     | A10036 | 1:400 (IF) |  | <a href="https://www.thermofisher.com/antibody/product/Donkey-anti-Mouse-IgG-H-L-Highly-Cross-Adsorbed-Secondary-Antibody-Polyclonal/A10036">https://www.thermofisher.com/antibody/product/Donkey-anti-Mouse-IgG-H-L-Highly-Cross-Adsorbed-Secondary-Antibody-Polyclonal/A10036</a>                                                             |
| Alexa Fluor 488 goat anti-rabbit IgG  | Invitrogen     | A11008 | 1:400 (IF) |  | <a href="https://www.thermofisher.com/antibody/product/Goat-anti-Rabbit-IgG-H-L-Cross-Adsorbed-Secondary-Antibody-Polyclonal/A-11008">https://www.thermofisher.com/antibody/product/Goat-anti-Rabbit-IgG-H-L-Cross-Adsorbed-Secondary-Antibody-Polyclonal/A-11008</a>                                                                           |
| Phalloidin                            | Invitrogen     | A30107 | 1:400      |  | <a href="https://www.thermofisher.com/order/catalog/product/A30107">https://www.thermofisher.com/order/catalog/product/A30107</a>                                                                                                                                                                                                               |
| DAPI                                  | Sigma Aldrich  | D9542  | 1:10000    |  | <a href="https://www.sigmaaldrich.com/GB/en/product/sigma/d9542">https://www.sigmaaldrich.com/GB/en/product/sigma/d9542</a>                                                                                                                                                                                                                     |
| Cd63                                  | BD Biosciences | 556019 | 35µg       |  | <a href="https://wwwbdbiosciences.com/en-gb/products/reagents/flow-cytometry-reagents/research-reagents/single-color-antibodies-ruo/purified-mouse-anti-human-cd63.556019">https://wwwbdbiosciences.com/en-gb/products/reagents/flow-cytometry-reagents/research-reagents/single-color-antibodies-ruo/purified-mouse-anti-human-cd63.556019</a> |
| PE Mouse Anti-human CD81              | BD Pharmigen   | 555676 | 1:50       |  | <a href="https://www.citeab.com/antibodies/2412825-555676-bd-pharmingen-pe-mouse-anti-human-cd81">https://www.citeab.com/antibodies/2412825-555676-bd-pharmingen-pe-mouse-anti-human-cd81</a>                                                                                                                                                   |

#### DNA/cDNA Clones

| Clone Name | Sequence | Source / Repository | Persistent ID / URL |
|------------|----------|---------------------|---------------------|
| N/A        |          |                     |                     |
|            |          |                     |                     |
|            |          |                     |                     |

#### Cultured Cells

| Name       | Vendor or Source | Sex (F, M, or unknown) | Persistent ID / URL |
|------------|------------------|------------------------|---------------------|
| 04.35F.11A | Primary cells    | F                      |                     |
| 03.38F.11A | Primary cells    | F                      |                     |
| 05.33F.5A  | Primary cells    | F                      |                     |

#### Other

| Description           | Source / Repository         | Persistent ID / URL                                                                                                                                                                                                 |
|-----------------------|-----------------------------|---------------------------------------------------------------------------------------------------------------------------------------------------------------------------------------------------------------------|
| Sodium Citrate Buffer | Vector Laboratories, H-3300 | <a href="https://vectorlabs.com/products/antigen-unmasking-solution-citric-acid-basedproduct-info-overview/">https://vectorlabs.com/products/antigen-unmasking-solution-citric-acid-basedproduct-info-overview/</a> |

DOI [to be added]

|                                                                               |                                    |                                                                                                                                                                                                                                                                                                                               |
|-------------------------------------------------------------------------------|------------------------------------|-------------------------------------------------------------------------------------------------------------------------------------------------------------------------------------------------------------------------------------------------------------------------------------------------------------------------------|
| Avidin-biotin complex (ABC) Reaction                                          | Vector Labs kits PK-6102 & PK-6010 | <a href="https://vectorlabs.com/products/vectastain-elite-abc-hrp-kit-mouse-igg/">https://vectorlabs.com/products/vectastain-elite-abc-hrp-kit-mouse-igg/</a>                                                                                                                                                                 |
| 3, 3'-diaminobenzidine (DAB) peroxidase substrate kit                         | Vector Laboratories; SK-4100       | <a href="https://vectorlabs.com/products/dab-hrp-substrate/">https://vectorlabs.com/products/dab-hrp-substrate/</a>                                                                                                                                                                                                           |
| RNA STAT-60                                                                   | Tel-Test Inc, CS-111               | <a href="https://www.amsbio.com/rna-stat-60-cs-111">https://www.amsbio.com/rna-stat-60-cs-111</a>                                                                                                                                                                                                                             |
| DEPC treated H <sub>2</sub> O                                                 | Ambion AM9915G                     | <a href="https://www.thermofisher.com/order/catalog/product/AM9915G">https://www.thermofisher.com/order/catalog/product/AM9915G</a>                                                                                                                                                                                           |
| GoScript™ Reverse Transcriptase                                               | Promega A5001                      | <a href="https://www.promega.co.uk/products/pcr/rt-pcr/goscript-reverse-transcriptase/?catNum=A5003">https://www.promega.co.uk/products/pcr/rt-pcr/goscript-reverse-transcriptase/?catNum=A5003</a>                                                                                                                           |
| SYBR Green Master Mix                                                         | PCR Bio, PB012619-120-22           | <a href="https://pcrbio.com/products/pcr/pcrbio-taq-dna-polymerase-mixes/">https://pcrbio.com/products/pcr/pcrbio-taq-dna-polymerase-mixes/</a>                                                                                                                                                                               |
| sulfa SANPAH solution                                                         | Thermo scientific, 22589           | <a href="https://www.thermofisher.com/order/catalog/product/22589">https://www.thermofisher.com/order/catalog/product/22589</a>                                                                                                                                                                                               |
| Collagen 1                                                                    | Gibco A10483                       | <a href="https://www.thermofisher.com/order/catalog/product/A1048301">https://www.thermofisher.com/order/catalog/product/A1048301</a>                                                                                                                                                                                         |
| Click-iT Edu                                                                  | ThermoFisher, C10337               | <a href="https://www.thermofisher.com/order/catalog/product/C10337">https://www.thermofisher.com/order/catalog/product/C10337</a>                                                                                                                                                                                             |
| aldehyde-sulphate beads                                                       | Invitrogen, A37304                 | <a href="https://www.thermofisher.com/order/catalog/product/A37304">https://www.thermofisher.com/order/catalog/product/A37304</a>                                                                                                                                                                                             |
| MES buffer                                                                    | Sigma, 76039                       | <a href="https://www.sigmaaldrich.com/GB/en/product/sigma/76039">https://www.sigmaaldrich.com/GB/en/product/sigma/76039</a>                                                                                                                                                                                                   |
| Solution13                                                                    | ChemoMetec, 910-3013               | <a href="https://chemometec.com/reagents/solution-13/?gad=1&amp;gclid=CjwKCAjwsKqoBhBPEiwALrrqilBqzFju0B6JHFKhe0dVBW7cAasK861AF4QO5kZICuP9b4BORa6-xoCS3YQAvD_BwE">https://chemometec.com/reagents/solution-13/?gad=1&amp;gclid=CjwKCAjwsKqoBhBPEiwALrrqilBqzFju0B6JHFKhe0dVBW7cAasK861AF4QO5kZICuP9b4BORa6-xoCS3YQAvD_BwE</a> |
| Chondroitinase ABC from <i>Potus vulgaris</i>                                 | Sigma, C3667-5UN                   | <a href="https://www.sigmaaldrich.com/GB/en/product/sigma/c2905">https://www.sigmaaldrich.com/GB/en/product/sigma/c2905</a>                                                                                                                                                                                                   |
| Heparinase II from <i>Flavobacterium heparinum</i>                            | Sigma, H6512-10UN                  | <a href="https://www.sigmaaldrich.com/GB/en/product/sigma/h6512">https://www.sigmaaldrich.com/GB/en/product/sigma/h6512</a>                                                                                                                                                                                                   |
| Endo-beta-galactosidase from <i>Bacteroides fragilis</i> (Keratanase)         | Sigma, G6920-.5UN                  | <a href="https://www.sigmaaldrich.com/GB/en/product/sigma/g6920">https://www.sigmaaldrich.com/GB/en/product/sigma/g6920</a>                                                                                                                                                                                                   |
| Glycoprotein Deglycosylation kit (3 de-branching enzymes + 1 O-deglycosidase) | EMD Millipore, 362280              | <a href="https://www.sigmaaldrich.com/GB/en/product/mm/362280">https://www.sigmaaldrich.com/GB/en/product/mm/362280</a>                                                                                                                                                                                                       |
| N-Glycosidase F (PNGaseF)                                                     | Sigma Aldrich, 362185-100U         | <a href="https://www.sigmaaldrich.com/GB/en/product/mm/362185">https://www.sigmaaldrich.com/GB/en/product/mm/362185</a>                                                                                                                                                                                                       |
| 4–20% precast polyacrylamide gel                                              | Biorad, 4561096                    | <a href="https://www.bio-rad.com/en-uk/sku/4561096-4-20-mini-protean-tgx-precast-protein-gels-15-well-15-ul?ID=4561096">https://www.bio-rad.com/en-uk/sku/4561096-4-20-mini-protean-tgx-precast-protein-gels-15-well-15-ul?ID=4561096</a>                                                                                     |

|                                         |                        |                                                                                                                                                                                                                                                                                                                 |
|-----------------------------------------|------------------------|-----------------------------------------------------------------------------------------------------------------------------------------------------------------------------------------------------------------------------------------------------------------------------------------------------------------|
| HiPerfect Transfection Reagent          | Qiagen, 301707         | <a href="https://www.qiagen.com/us/products/discovery-and-translational-research/functional-and-cell-analysis/transfection/hiperfect-transfection-reagent">https://www.qiagen.com/us/products/discovery-and-translational-research/functional-and-cell-analysis/transfection/hiperfect-transfection-reagent</a> |
| Fluoromount-G                           | Invitrogen, 00-4958-02 | <a href="https://www.thermofisher.com/order/catalog/product/00-4958-02">https://www.thermofisher.com/order/catalog/product/00-4958-02</a>                                                                                                                                                                       |
| Dulbecco's modified eagle medium (DMEM) | Sigma, D5921           | <a href="https://www.sigmaaldrich.com/GB/en/product/sigma/d5921">https://www.sigmaaldrich.com/GB/en/product/sigma/d5921</a>                                                                                                                                                                                     |
