# Supplementary material for: Sox9 Accelerates Vascular Aging by Regulating Extracellular Matrix Composition and Stiffness
Source: PubMed Central journal article supplement (PMC10826924; doi:10.1161/circresaha.123.323365), 2024-01-05

Figure 1c: Sox9 expression in young and senescent VSMCs

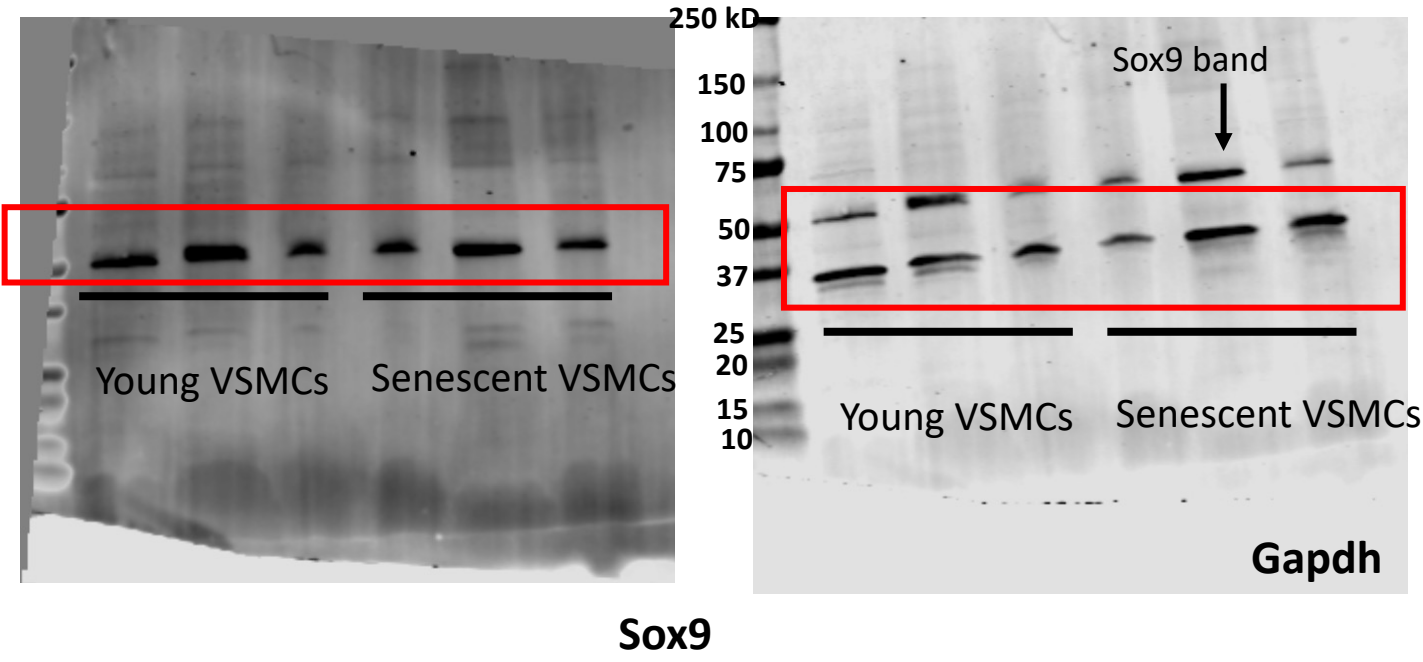

Figure 2j: Sox9 expression on hydrogels

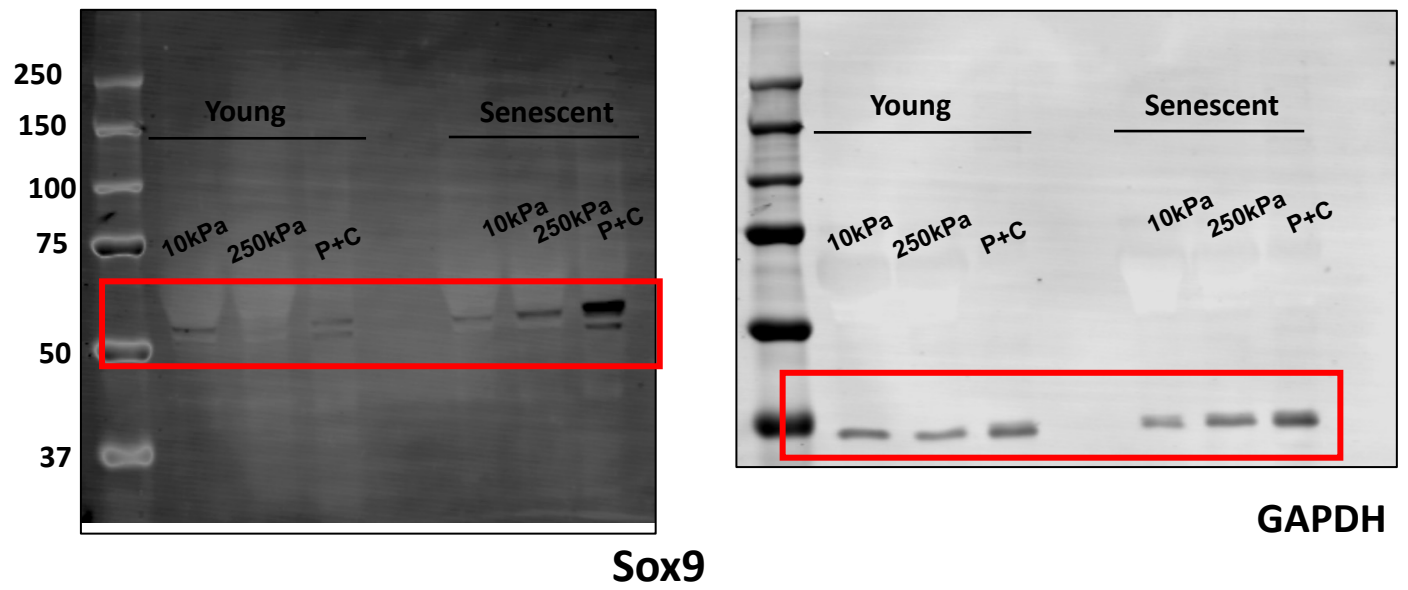

Put ladder sizes and mark the protein band

Figure 6c: LH3 in Cell Lysate

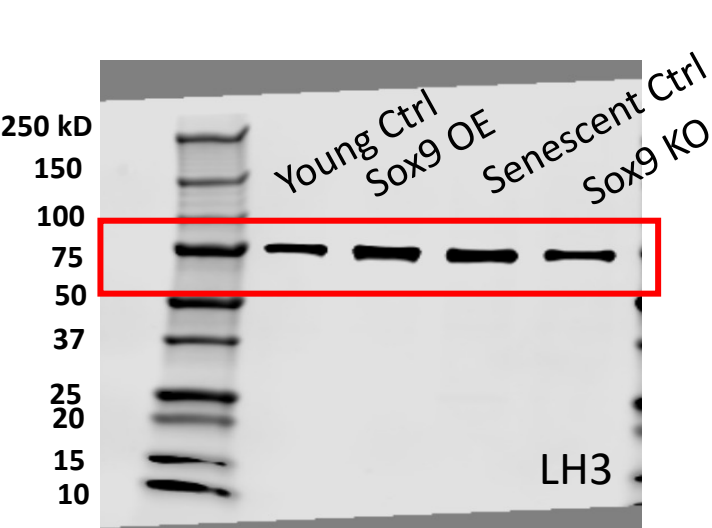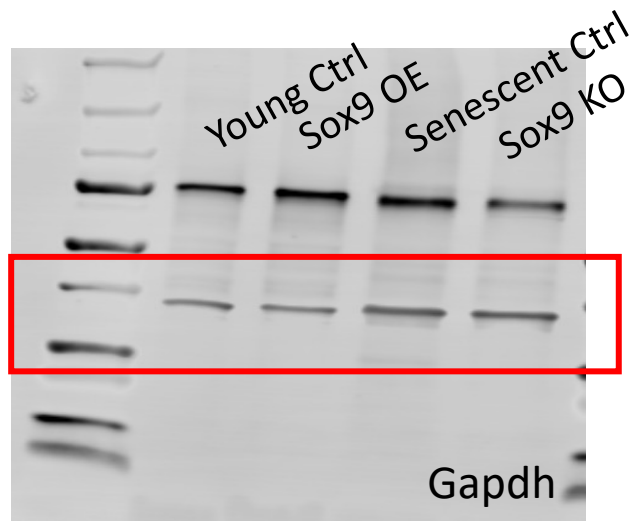

Figure 6d: LH3 in ECM Lysate

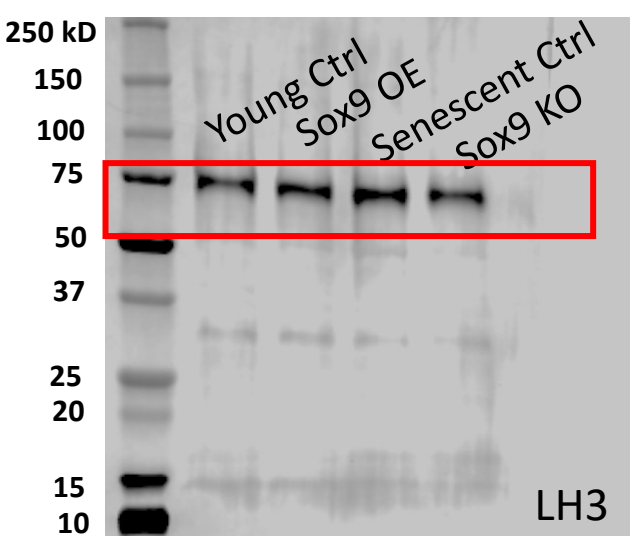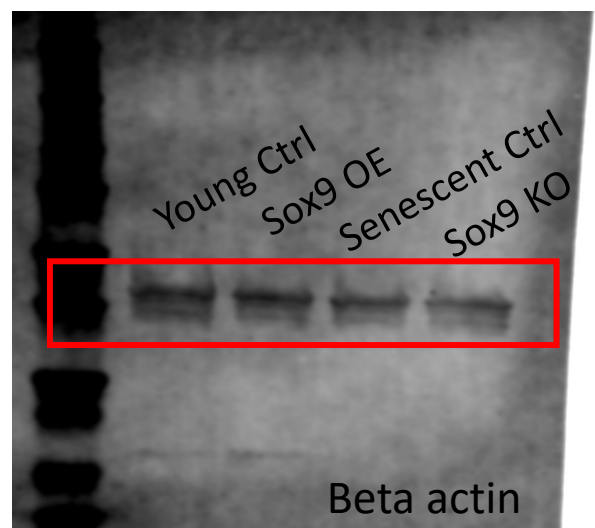

Figure 8f: LH3 in Extracellular Vesicles

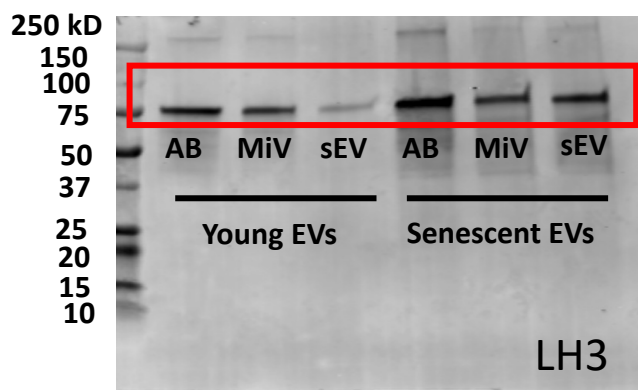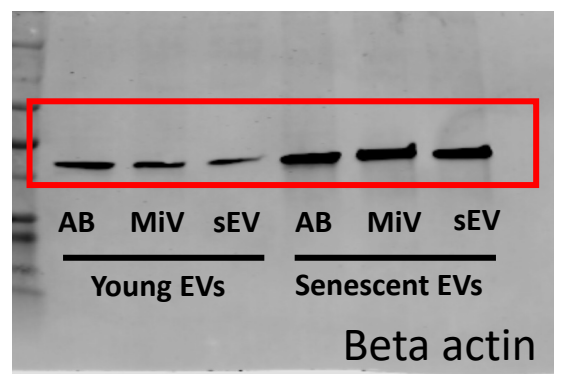

Supplementary Figure 2c:

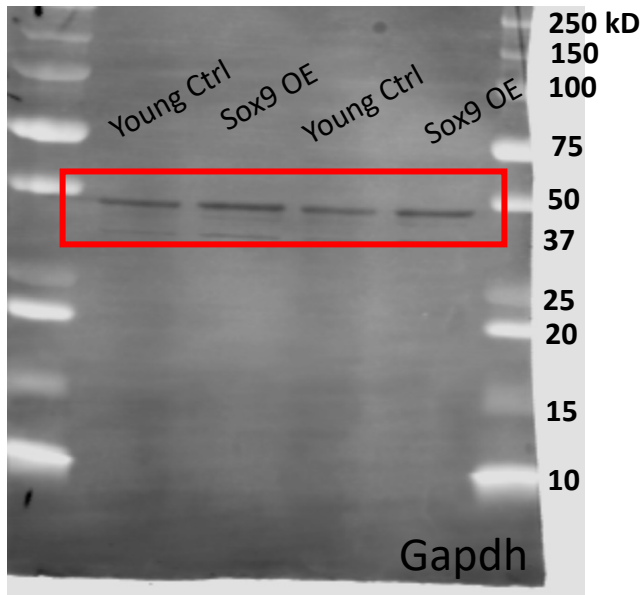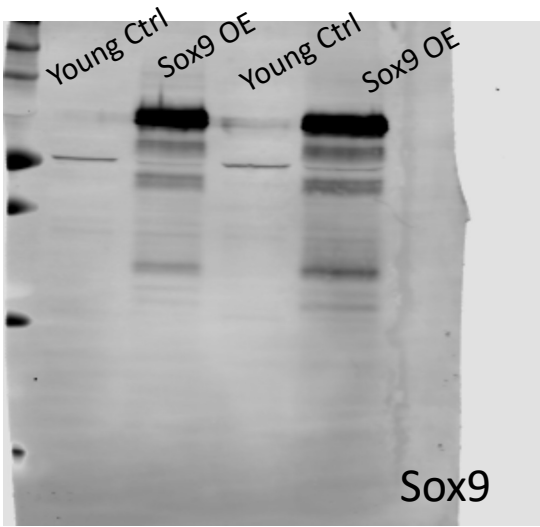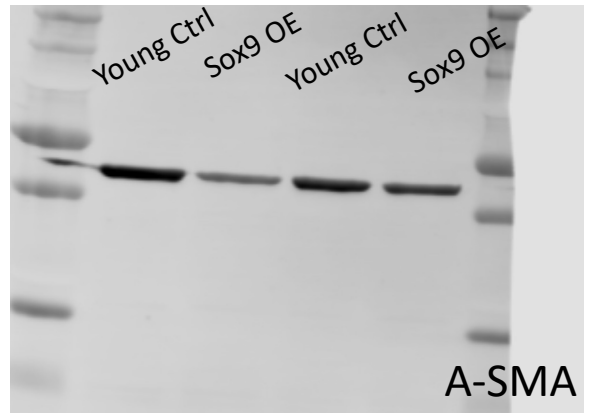

Supplementary Figure 2d:

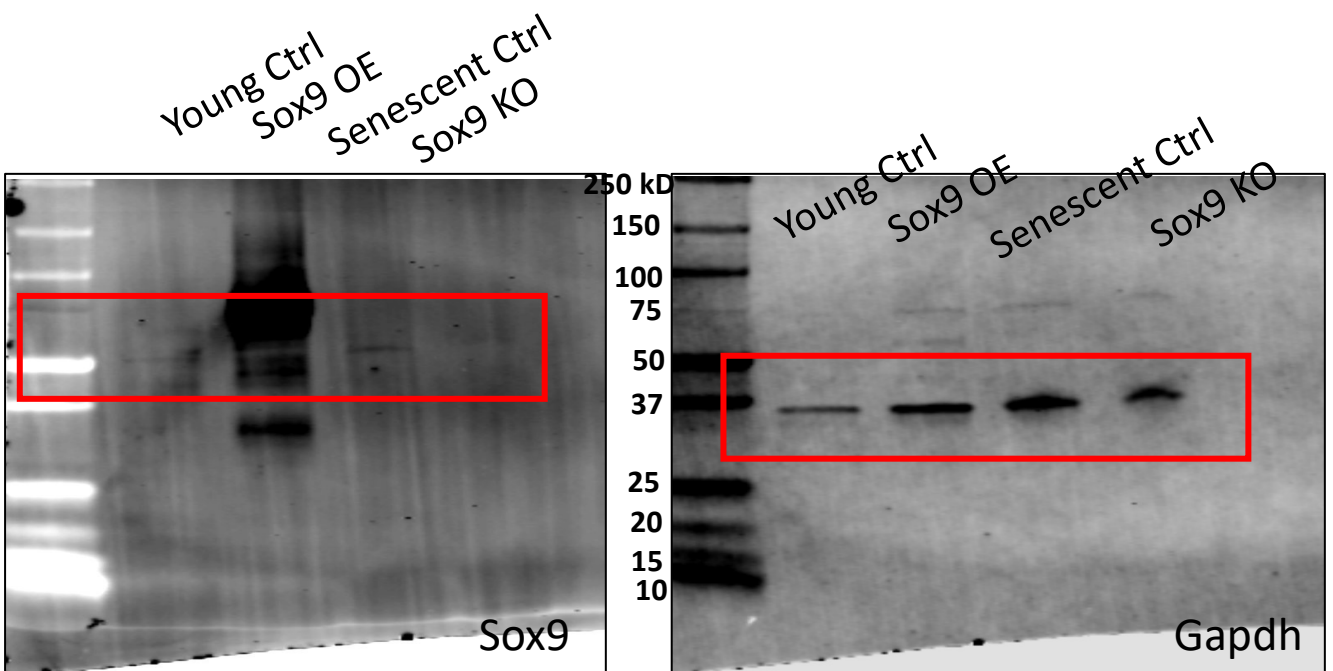

# Supplementary Figure 5b:

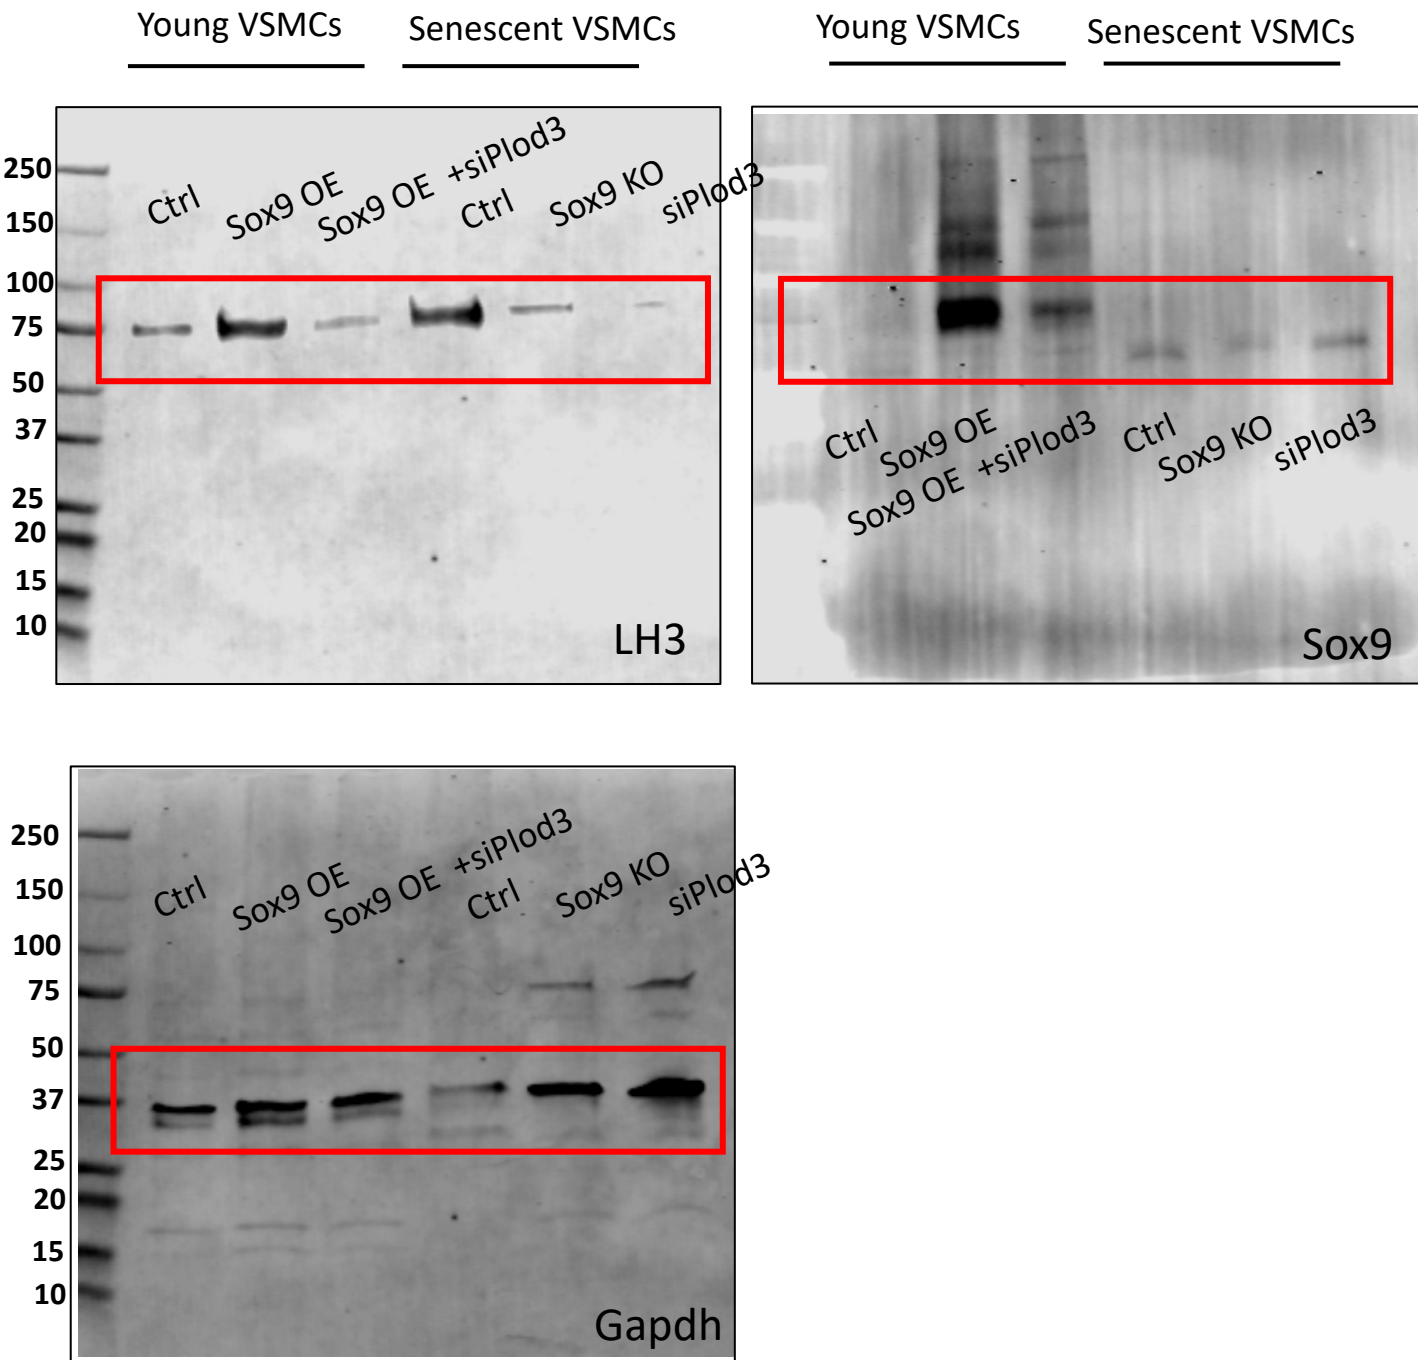

Supplement: res-134-307-s002.pdf [file res-134-307-s002.pdf]
